# Supplementary material for: The Organization of the Pig T-cell Receptor Gamma (TRG) Locus Provides Insights Into the Evolutionary Patterns of the TRG Genes Across Cetartiodactyla
Source: Preprints.org preprint supplement (doi:10.20944/preprints202112.0377.v1), 2021-12-23
Supplement: Supplementary file 1 [file Figure S1.doc]

**(A)**

LEADER FR1-IMGT CDR1-IMGT FR2-IMGT CDR2-IMGT FR3-IMGT CDR3-IMGT

(1-26) (27-38) (39-55) (56-65) (66-104) (105-117)

A B BC C C' C'C" C" D E F FG

(1-15) (16-26) (27-38) (39-46) (47-55) (56-65) (66-74) (75-84) (85-96) (97-104) (105-117)

——————————————> ——————————> ———————> ————————> ————————> —————————> ———————————> ———————>

Gene Functionality 1 10 15 16 **23** 26 27 38 39**41** 46 47 55 56 65 66 74 75 80 84 85 **89** 96 97 **104** 105

|........|....| |......|..| |..........| |.|....| |.......| |........| |.......| |....|...| |...|......| |......| |......

TRGV3  F MSVLEAFTFLSFWALGLS LSRVEQSQISVSAEV KKSVDIN**C**KIE STNF....PTEA VH**W**YRQRM NQALEHLIF VSSV..TVPA QSQIGGKSN KVVARKNSQT FTST**L**TVNFIEK EDEGIYY**C** AGWN... [8.8.4]

TRGV4  P MWIFLVSLAWVYGET KMRISQDQLSST*RL DRTVQIS**C**KLS GVPL....KNAI VH**W**YQQKE GEPLK*ILY GS......TN SYQLDEPNS SLETVTK.DK GIFY**L**VISNVVK SDEATYY**C** ACWD... [8.4.4]

TRGV6 F MLGCLALLWALLVPGA QEIRLVQLPVIVSRV GNSVTMP**C**RIN TSV.......SY IH**W**YRQLE GQAPERLLY LATS..QRDV QWDSVLQGN KVTAKKGNDD KSCT**L**SLMKLEK SDEGLYY**C** AAWDS.. [5.8.5]

TRGV7  F MALLEAVVFSFFWAVGLG MLRLEQPEISITAAR QKSALIA**C**KVS SENF....NDAY IH**W**YRHKS DQGMEHLMY HVT....VFT LSHLGEKKN KLEARKIAST STAT**L**KINFLEQ EDEATYY**C** ASWFY.. [8.6.5]

TRGV10 F MVIQTRLTNFAIALNLSGRQYTSG DILTTHPVASITKKR GNTAFLE**C**QIK TDTLK...RNVY TH**W**YRQKP DQPLKRILY ISSN...ENI VYEQGISEE KYEARKWLSN SLVN**L**RIHGVTE EDTGLYY**C** ACWN... [9.7.4]

TRGV12-1 F MRFPGVLLVFLAPVTQV SSNVEGDKMSVTRAT GSSLVIT**C**DLT QNT.......NY IH**W**YRFRE GTVPQRLLY YDVS..SSKV TLESGISPG RYHAYQS.AG KSYQ**F**VISNLEE SDSGTYY**C** AVWEK.. [5.8.5]

TRGV12-2 F MRFPGVLLVFLVPVTQV SSNVEGDKMSVTRAP GTAVSFT**C**ALT QNT.......NY IH**V**YTKKE GTAPQRLFY YDIY..YSKF TLESGDSPE KYRVYAG.TS KSYT**F**TMLYLEE RDSGTYY**C** ALWDK.. [5.8.5]

**(B)**

TRGJ J-NONAMER J-SPACER J-HEPTAMER

gene name GGTTTTTGT ************ CACTGTG

J-REGION 5'splice donor

TRGJ3-1 gttttttgt aggagctttaac cagtgtg ATAACTGGAAGAAGATATTTGGAAAGGCACTGGAGCTCATAGTAGCTCCCTATG gtaagt

N W K K I F G K A L E L I V A P Y

*TRGJ4-1 gttttttgt aggagctttaac cagtgtg ATAAACTGGAAGAAGATATTTGAAAAGGCACTGGAGCTCATAGTAGCTCCCTATG gtaagt*

*I N W K K I F E K A L E L I V A P Y*

TRGJ5-1 ggtttttat aggagctttaac cagtgtg ATAGCTCACGCTGGATCAAGATATTTGGAGAGGGGACTAAGCTCATAGTAACTCCCCCTG gtaagt

S S R W I K I F G E G T K L I V T P P

TRGJ5-2 agtttttga tatagattgaat cactgtg GCCTGATTACGTAAAAGTCTTCGGAGATGGAACAAAACTTGCTGTTACA gtaggt

P D Y V K V F G D G T K L A V T

*TRGJ6-1 ggaattttt gtaggcactcta agcagtg ATAACTCAGGCTGGATCAAGATATTTGGAGAAGGGAGTAAACTCATAGAAACTCCCCCTG gtaagt*

*N S G W I K I F G E G S K L I E T P P*

TRGJ6-2 agtttttga tatgggttgaat cactgtg GACTTCATACAACAAAATCTTCGGTGCTGGAACAAAACTTTTCGTCATAG gtaggt

T S Y N K I F G A G T K L F V I

**(C)**

[EX1]

A AB B BC C CD D DE E EF F FG G

(1-15) (16-26) (27-38) (39-45) (77-84) (85-96) (97-104) (105-117) (118-128)

——————————————> ——————————> ——————> ———————> ———————————> ———————> ——————————

1 10 15 16 **23** 26 27 38 39**41** 45 77 84 85 **89** 96 97 **104** 105 117 118

87654321|........|....|123|......|..| |........| |.|...|1234567|......|12345677654321|...|......|12|......| |...........| |........

*Susscr* TRGC3 (D)INLASDISPKPTVFLPSIAEIKL..HNAGTYL**C**LLE NFFP..NVIK VY**W**KEKNGNKVL..ESQQGNTMRTTN.......TYMKFSW**L**TVSKT....AMDKEHK**C** VVKHEKNRGGVDQ EIIFPSVNE

*Susscr* TRGC4 (D)INLASDLSPKPTVFLPSIAEIKL..HNAGTYL**C**LLE NFFP..NVIK VY**W**KEKNGNKVL..ESQQGNTMRTTN.......TYMKFSW**L**TVSKT....AMDKEHK**C** VVKHEKNRGGVDQ EIIFPSVNE

*Susscr* TRGC5 (D)RNLAADMSPKPTIFLPSIAEINL..HNTGTHL**C**LLE KFFP..DAIK VY**W**KEKNGNTVL..DSQQGDVIQTND.......TYMKFSW**L**TVTQK....SADKEHI**C** IVKHENNKRGTDQ EILFPSMNK

*Susscr* TRGC6 (D)RNLATDMTPKPTVFLPSIAEIEH..SKVGTYL**C**LLE KFFP..NAIQ VY**W**KEKNDNRVL..ESMQGNTVKTDD.......TYMKFSW**L**TVSEE....SMGKEHI**C** FVKHEKNRVEPVQ EILFPSINE

CONNECTING-REGION TRANSMEMBRANE-REGION CYTOPLASMIC-REGION

[EX2A] [EX2B] [EX2C] [EX3]

*Susscr* TRGC3 (V)VSSAVMPTDSPNDCLKDES (K)VSDSDSRKACVRNES (E)VTNSTKACLKDES (N)TLQLQLENTSAYYTYLLLLLKSSLYFATTISCLFRRTV.CSSGKTS

*Susscr* TRGC4 (V)VTSVVTTTEPPNDCLNDGS (K)ATGIDSEKACKKDHS (E)VTVTDSKKVCQKDES (N)SLQLQLENTSAYYTYLLLLLKSTLYFAIITCCLFRRTV.CSSGKTS

*Susscr* TRGC5 (E)VTTDVCLKDTS (G)TMQLQLTNTSAYYTYLLLLLKSALYFAIITYCLFRETTVCSAWKRS

*Susscr* TRGC6 (V)VSSAVMPTDSPNDCLKDES (K)VSDSDSRKACVRNES (E)ITNSTKACLKDES (N)TLQLQLENTSAYYTYLLLLLKSTLYFATVLSCLFRRTV.CSSGKTS
