# Supplementary material for: The Organization of the Pig T-cell Receptor Gamma (TRG) Locus Provides Insights Into the Evolutionary Patterns of the TRG Genes Across Cetartiodactyla
Source: Preprints.org preprint supplement (doi:10.20944/preprints202112.0377.v1), 2021-12-23
Supplement: Supplementary file 4 [file Supplementary Table S1.doc]

**Table S1.** Description of the related and no related TRG genes in the *Sus scrofa* chromosome 9 genome assembly (NCBI Reference Sequence NC_010451.4). The position of all genes and their classification and functionality are reported. The position of the J promoters (PJ) and enhancer elements (EnC) are also inserted.

| **Gene classification** | **Functionality** | **Position**a  (complement) |
| --- | --- | --- |
| AMPH | F | 108800898-108971498 |
| TRGV11 | P1 | 108791329-108791795 |
| TRGV3 | F | 108783758-108784225 |
| TRGV7 | F | 108781929-108782395 |
| TRGV10 | F | 108778140-108778618 |
| TRGV4 | P2 | 108776148-108776578 |
| PJ5 | - | 108771874-108772273 |
| TRGJ5-1 | F | 108771814-108771873 |
| TRGJ5-2 | F | 108768979-108769027 |
| TRGC5 | F | 108760275-108765636 |
| EnC5 | - | 108757853-108758005 |
| TRGV6 | Fb | 108752589-108753018 |
| PJ6 | - | 108746720-108747119 |
| TRGJ6-1 | ORF3 | 108746660-108746719 |
| TRGJ6-2 | F | 108743190-108743239 |
| TRGC6 | F | 108732805-108740151 |
| EnC6 | - | 108729968-108730120 |
| TRGV12-1 | F | 108719508-108719974 |
| PJ3 | - | 108715278-108715677 |
| TRGJ3-1 | F | 108715224-108715277 |
| TRGC3 | F | 108705517-108712310 |
| EnC3 | - | 108702679-108702831 |
| TRGV12-2 | Fb | 108692578-108693036 |
| PJ4 | - | 108686628-108687027 |
| TRGJ4-1 | ORF4 | 108686567-108686595 |
| TRGC4 | Fc | 108678980-108683647 |
| EnC4 | - | 108677153-108677305 |
| STARD3NL | F | 108654070-108673560 |

a L-PART1/ V-exon for TRGV genes; bF is referred to the same gene detected within productive cDNAs; cF is referred to the same gene detected within productive cDNAs and Sscrofa10.2 genome assembly

1 Frameshift in L-PART1; frameshift in V-exon

2 Stop codons in V-exon

3 No canonical J-HEPTAMER

4 FEXA instead of FGXA
